# Supplementary material
Source: publisher figshare collection journal article supplement (https://acs.figshare.com/ndownloader/files/19164767)
Supplement: Supplementary file 1 [file 19164767]

# Supporting Information

## Ribbon Phase of Dendrimer-Surfactant Complexes

Chih-Mei Young<sup>1</sup>, Yu-Fan Chang<sup>1</sup>, Yu-Hsiang Chen<sup>1,2</sup>, Chun-Yu Chen<sup>3</sup>, and Hsin-Lung Chen<sup>1\*</sup>

<sup>1</sup>Department of Chemical Engineering, National Tsing Hua University, Hsinchu 30013, Taiwan

<sup>2</sup>Material and Chemical Research Laboratories, Industrial Technology Research Institute, Chutung, Hsinchu 31057, Taiwan

<sup>3</sup>Experimental Facility Division, National Synchrotron Radiation Research Center, Hsinchu 30076, Taiwan

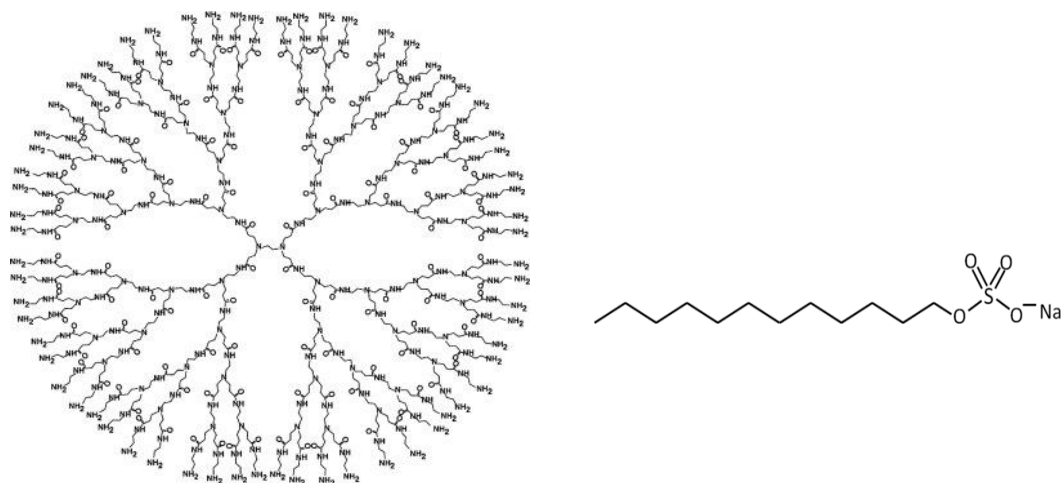

**Scheme S1.** Chemical structures of PAMAM G4 dendrimer and SDS

### <sup>1</sup>H NMR spectroscopy experiment for determination of actual SDS binding ratio, $X_a$

<sup>1</sup>H NMR measurements of PAMAM G4 dendrimer, SDS and their complexes in d<sub>4</sub>-methanol were performed with a Bruker AVANCE 500 MHz NMR spectrometer at

298.2K. The samples were loaded in 5 mm BBFO smart probe. For the NMR measurement, the complex precipitate in the aqueous solution was collected after centrifugation at 3000 rpm for 5 minutes. The precipitate was then dried followed by dissolving in  $d_4$ -methanol for  $^1\text{H}$  NMR measurement.

Figure S1 (a) and (b) show the  $^1\text{H}$  NMR spectra and the assignments of the chemical shifts of neat PAMAM G4 dendrimer and SDS, respectively. For the dendrimer, the  $^1\text{H}$  NMR spectrum shows mainly four peaks associated with the four methylene groups (a~d) of the repetitive unit at the interior and two methylene groups ( $b^*$  and  $d^*$ ) at the outermost layer of dendrimer<sup>1,2</sup>. In the  $^1\text{H}$  NMR spectrum of SDS, there are four obvious peaks denoted as 1~4 and their assignments are shown in the left panel of Fig. S1(b). The total area of the methylene peaks is contributed by 992 protons per dendrimer molecule, while one SDS molecule contributes 25 protons to the corresponding proton peaks.

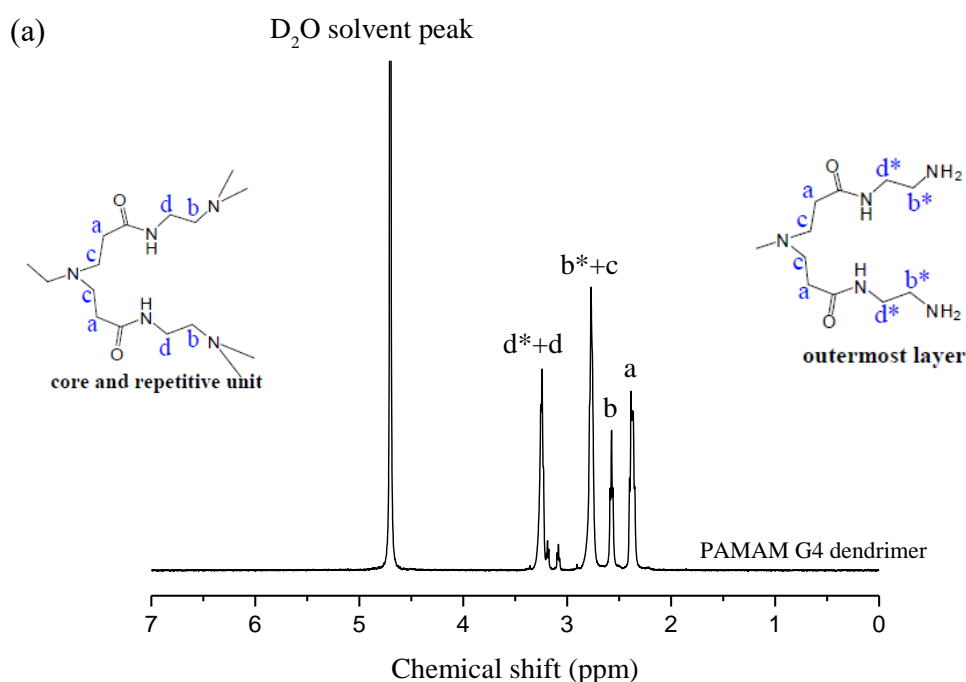

(b)

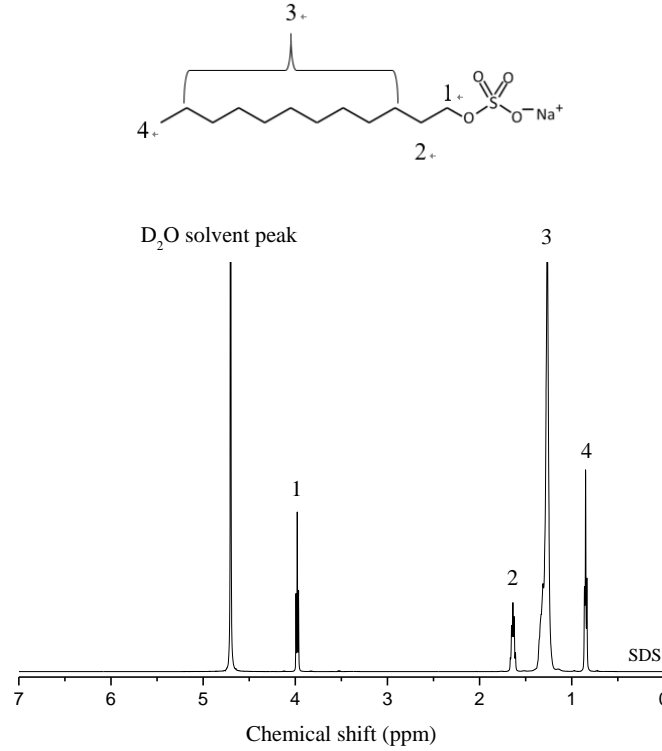

**Figure S1.** Assignments of the chemical shifts and the corresponding  $^1\text{H}$  NMR spectra of (a) PAMAM G4 dendrimer and (b) sodium dodecyl sulfate (SDS).

Figure S2 shows the representative  $^1\text{H}$  NMR spectrum of the  $x_n/1.0$  complex in  $\text{d}_4$ -methanol. The downfield shifts of the peaks associated with the dendrimer and SDS in the complex relative to those of the pure constituents verified that SDS molecules interacted with PAMAM dendrimer through ionic interaction. The  $X_a$  of the complex was calculated as follows. Firstly, we obtained the actual ratio of the number of methylene protons from dendrimer to the protons of SDS from the corresponding integrated peak areas, i.e.,  $A_{G4}/A_{SDS}$ . This ratio is given by

$$\frac{A_{G4}}{A_{SDS}} = \frac{992}{25n_s} \quad (1)$$

where  $n_s$  is the number of SDS molecules bound with a dendrimer molecule. Then, we used the actual binding number ( $n_s$ ) of SDS to calculate the actual binding ratio  $X_a$  via

$X_a = n_s / 126$ . The number 126 denoted the total number of amine groups in a dendrimer molecule. Table S1 lists the  $X_a$  of the complex samples prepared.

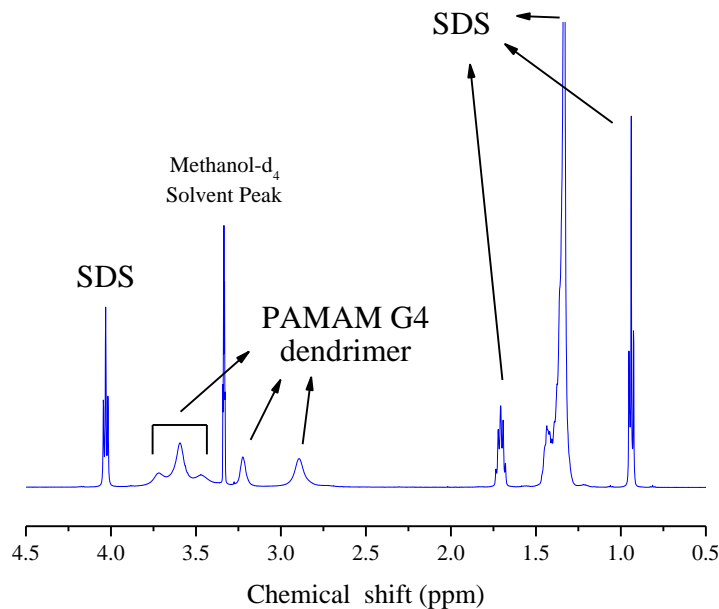

**Figure S2.**  $^1\text{H}$  NMR spectrum of the  $x_n/1.0$  complex. The downfield shifts of the peaks associated with the dendrimer and SDS in the complex relative to those of the pure constituents verified that SDS molecules interacted with PAMAM dendrimer through ionic interaction.

**Table S1.** The actual composition  $X_a$  and the lattice parameters of the complex samples prepared

| $X_n$ | $X_a$ | Structure         | a (Å) | b (Å) | l (Å) | $\gamma$ (°) |
|-------|-------|-------------------|-------|-------|-------|--------------|
| 0.1   | 0.75  |                   | 48.6  | 70.6  | 42.9  | 55.5         |
| 0.3   | 0.82  |                   | 48.5  | 70.76 | 42.9  | 55.6         |
| 0.4   | 0.86  |                   | 48.9  | 70.88 | 43    | 55.3         |
| 0.5   | 0.90  | Col <sub>cr</sub> | 48.9  | 71.04 | 43    | 55.3         |
| 0.6   | 0.93  |                   | 48.7  | 70.52 | 42.9  | 55.4         |
| 0.7   | 0.97  |                   | 48.6  | 70.08 | 43    | 55.6         |
| 0.8   | 1.01  |                   | 48.5  | 70.08 | 42.9  | 55.6         |

|     |      |                   |      |    |      |    |
|-----|------|-------------------|------|----|------|----|
| 0.9 | 1.04 | Col <sub>ob</sub> | 44.8 | -- | 41.2 | 60 |
| 1.0 | 1.08 |                   | 44.3 | -- | 41.2 | 60 |

### The actual compositions of $X_n/0.5$ and $X_n/1.0$ complexes as a function of salt concentration

The actual composition of the complex prepared was largely unaffected by the presence of salt, as demonstrated in Figure S3 showing that  $X_a$  of  $X_n/0.5$  and  $X_n/1.0$  complex samples retained at ca. 0.9 and 1.0, respectively, over the salt concentration range studied.

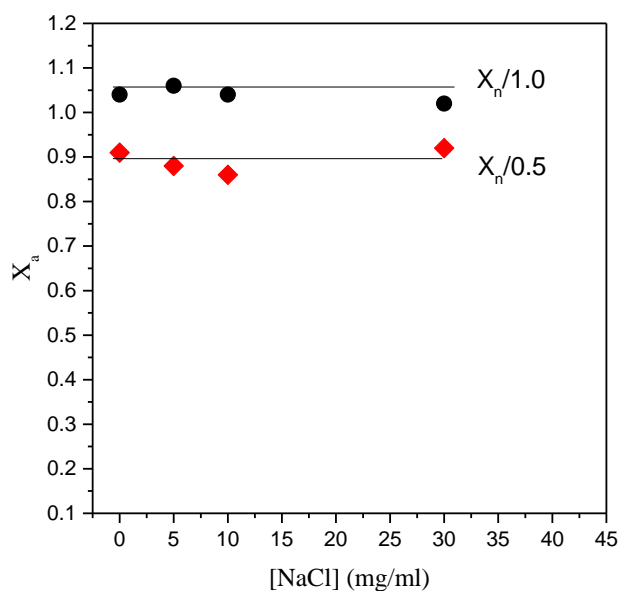

**Figure S3.** Actual binding ratio,  $X_a$ , of  $X_n/0.5$  and  $X_n/1.0$  complexes determined by  $^1\text{H}$  NMR spectroscopy as a function of NaCl concentration.

### References

- (1) Hu, J.; Cheng, Y.; Ma, Y.; Wu, Q.; Xu, T., *J. Phys. Chem. B* **2009**, *113* (1), 64-74.
- (2) Yang, K.; Cheng, Y.; Feng, X.; Zhang, J.; Wu, Q.; Xu, T., *J. Phys. Chem. B* **2010**, *114* (21), 7265-7273.
